# Supplementary material for: Stiffness and tension gradients of the hair cell’s tip-link complex in the mammalian cochlea
Source: eLife. 2019 Apr 1;8:e43473. doi: 10.7554/eLife.43473 (PMC6464607; doi:10.7554/eLife.43473)
Supplement: Figure 2—source data 2. [file elife-43473-fig2-data2.xlsx]

## Sheet: Figure 2E - Summary data 
	CF (kHz)	KHB (mN/m)
		IHC	OHC
mean	1	1.7	2.5
sem		0.2	0.2
n		19	19
mean	2	1.9	3.8
sem		0.1	0.3
n		17	11
mean	4	3.8	8.6
sem		0.4	0.5
n		19	21
mean	15	5.5
sem		0.4
n		14

## Sheet: Figure 2E - Raw data
KHB (mN/m)
OHC				IHC
1kHz	2kHz	4kHz		1kHz	2kHz	4kHz	15kHz
0.8	2.3	4.6		0.6	0.8	1	2.9
1.1	2.8	5.6		0.7	1.1	2	3
1.6	3.1	6.6		1	1.4	2.1	3.9
1.7	3.5	6.7		1	1.4	2.3	4.6
1.8	3.7	6.7		1.1	1.7	2.3	5.2
2	3.9	6.8		1.2	1.7	2.6	5.3
2	4.1	7.1		1.3	1.8	2.6	5.8
2.1	4.1	7.2		1.4	1.8	2.9	5.9
2.3	4.3	7.3		1.4	1.9	3.5	6.1
2.5	4.7	8.5		1.5	2	3.7	6.6
2.6	5.4	8.5		1.7	2	3.7	6.8
2.6		8.7		1.9	2.3	3.8	6.9
2.8		8.7		2.1	2.3	4	6.9
3		8.7		2.2	2.3	4.3	7.5
3.1		9.1		2.2	2.6	4.6
3.1		9.3		2.5	2.6	5.6
3.8		11.4		2.9	2.9	6.8
3.9		11.8		2.9		6.9
4.4		11.8		3.6		7
		12.2
		12.4
