# Supplementary material for: Stiffness and tension gradients of the hair cell’s tip-link complex in the mammalian cochlea
Source: eLife. 2019 Apr 1;8:e43473. doi: 10.7554/eLife.43473 (PMC6464607; doi:10.7554/eLife.43473)
Supplement: Figure 3—source data 2. — The table lists p-values resulting, respectively, from a one-way ANOVA to assay statistical significance of the measured mean-value variation of a given variable between different cochlear locations for inner (IHC) and outer (OHC) hair cells, from two-tailed unpaired Student's t-tests with Welch’s correction to compare mean values of the variable between two groups of a given hair-cell type (IHC or OHC) with different characteristic frequencies (CF) or between the two cell types (OHC/IHC) when they are associated to the same characteristic frequency. The last entry provides the p-value to assay the statistical significance between the slopes of a weighted linear regression of the relation between the variable and the characteristic frequency of the hair cell. A bold font was used to help find statistically significant differences. The variables in the table correspond to the relative contribution r and the absolute contribution ΚGS of the gating springs to the hair-bundle stiffness, the contribution ΚSP of the stereociliary pivots to the hair-bundle stiffness, the rotational stiffness κ of a single stereocilium, and the stiffness kGS of a single gating spring. [file elife-43473-fig3-data2.docx]

|  | **ANOVA** | | **IHC** | | | | | |
| --- | --- | --- | --- | --- | --- | --- | --- | --- |
|  | IHC | OHC | 1-2 kHz | 1-4 kHz | 1-15 kHz | 2-4kHz | 2-15 kHz | 4-15 kHz |
|  | *p* =  7.6×10-2 | ****p* =**  **2.0×10-2** | *p* =  5.3×10-2 | *p* =  1.2×10-1 | *p* =  9.2×10-2 | *p* =  3.2×10-1 | *p* =  4.3×10-1 | *p* =  7.4×10-1 |
|  | ******p* =**  **1.3×10-5** | ******p* =**  **1.7×10-6** | ****p* =**  **2.1×10-2** | ******p* =**  **8.9×10-5** | ******p* =**  **3.3×10-6** | ****p* =**  **4.2×10-2** | ******p* =**  **4.4×10-4** | ****p* =**  **3.9×10-2** |
|  | ******p* =**  **2.0×10-14** | ******p* =**  **8.3×10-8** | *p* =  6.6×10-1 | ******p* =**  **1.9×10-4** | ******p* =**  **1.5×10-8** | ******p* =**  **3.6×10-5** | ******p* =**  **1.3×10-8** | *****p* =**  **4.1×10-3** |
|  | *****p* =**  **1.0×10-3** | *p* =   7.7×10-1 | *p* =  1.6×10-1 | *p* =  7.0×10-2 | ****p* =**  **1.4×10-2** | *****p* =**  **1.6×10-3** | ******p* =**  **3.9×10-5** | *p* =  7.3×10-1 |
|  | ****p* =**  **3.0×10-2** | *****p* =**  **1.9×10-3** | *p* =  3.0×10-1 | *****p* =**  **1.6×10-3** | *****p* =**  **1.8×10-3** | ****p* =**  **1.5×10-2** | ****p* =**  **1.6×10-2** | *p* =  1 |
|  | **OHC** | | | **OHC/IHC** | | | Gradient OHC *vs.*  gradient IHC | |
|  | 1-2 kHz | 1-4 kHz | 2-4 kHz | 1 kHz | 2 kHz | 4 kHz |
|  | *p* =  5.8×10-1 | ****p* =**  **1.3×10-2** | *p* =  5.5×10-2 | *p* =  2.7×10-1 | *p* =  5.3×10-1 | ****p* =**  **2.1×10-2** | ****p* =  2.8×10-2** | |
|  | *p* =  1.5×10-1 | ******p* =**  **2.2×10-4** | ******p* =**  **7.1×10-4** | ****p* =**  **1.4×10-2** | *p* =  1.5×10-1 | ******p* =**  **7.0×10-4** | *p* =  1.6×10-1 | |
|  | ****p* =**  **1.8×10-2** | ******p* =**  **2.1×10-5** | ******p* =**  **9.5×10-4** | ****p* =  3.9×10-2** | ******p* =**  **5.2×10-5** | ******p* =**  **9.1×10-4** | *****p* =  7.6×10-3** | |
|  | *p* =  6.6×10-1 | *p* =  4.8×10-1 | *p* =  6.6×10-1 | *****p* =**  **8.1×10-3** | ******p* =**  **1.4×10-9** | *****p* =**  **6.1×10-3** | *p* =  1.9×10-1 | |
|  | *p* =  6.9×10-1 | *****p* =**  **6.1×10-3** | *****p* =**  **8.5×10-3** | *p* =  8.1×10-2 | *p* =  6.3×10-2 | ****p* =**  **1.5×10-2** | *p* =  1.5×10-1 | |

**Figure 3‒source data 2: Statistical significance.**

The table lists p-values resulting, respectively, from a one-way ANOVA to assay statistical significance of the measured mean-value variation of a given variable between different cochlear locations for inner (IHC) and outer (OHC) hair cells, from two-tailed unpaired Student's *t*-tests with Welch’s correction to compare mean values of the variable between two groups of a given hair-cell type (IHC or OHC) with different characteristic frequencies (CF) or between the two cell types (OHC/IHC) when they are associated to the same characteristic frequency. The last entry provides the p-value to assay the statistical significance between the slopes of a weighted linear regression of the relation between the variable and the characteristic frequency of the hair cell. A bold font was used to help find statistically significant differences. The variables in the table correspond to the relative contribution and the absolute contribution of the gating springs to the hair-bundle stiffness, the contribution of the stereociliary pivots to the hair-bundle stiffness, the rotational stiffness of a single stereocilium, and the stiffness of a single gating spring.
