# Supplementary material for: Stiffness and tension gradients of the hair cell’s tip-link complex in the mammalian cochlea
Source: eLife. 2019 Apr 1;8:e43473. doi: 10.7554/eLife.43473 (PMC6464607; doi:10.7554/eLife.43473)
Supplement: Figure 3—source data 3. [file elife-43473-fig3-data3.xlsx]

## Sheet: Summary data
	CF (kHz)	r
		IHC	OHC
mean	1	0.12	0.18
sem		0.04	0.03
n		10	10
mean	2	0.25	0.21
sem		0.04	0.04
n		10	10
mean	4	0.2	0.36
sem		0.02	0.06
n		10	11
mean	15	0.21
sem		0.02
n		10

## Sheet: Raw data
Gating-spring contribution r to hair-bundle stiffness
OHC				IHC
1kHz	2kHz	4kHz		1kHz	2kHz	4kHz	15kHz
0.08	0.03	0.03		-0.21	-0.02	0.11	0.11
0.09	0.11	0.11		0.04	0.12	0.14	0.15
0.09	0.13	0.24		0.06	0.15	0.15	0.16
0.12	0.17	0.26		0.1	0.26	0.15	0.17
0.16	0.17	0.29		0.15	0.27	0.19	0.19
0.2	0.17	0.39		0.19	0.28	0.21	0.2
0.23	0.21	0.45		0.22	0.29	0.22	0.21
0.26	0.26	0.48		0.23	0.33	0.24	0.25
0.27	0.28	0.5		0.23	0.4	0.25	0.3
0.31	0.53	0.52		0.24	0.43	0.31	0.34
		0.68
