# Supplementary material for: Stiffness and tension gradients of the hair cell’s tip-link complex in the mammalian cochlea
Source: eLife. 2019 Apr 1;8:e43473. doi: 10.7554/eLife.43473 (PMC6464607; doi:10.7554/eLife.43473)
Supplement: Figure 3—source data 4. [file elife-43473-fig3-data4.xlsx]

## Sheet: Summary data
	CF (kHz)	h (µm)		W (µm)		g		NSP
		IHC	OHC	IHC	OHC	IHC	OHC	IHC	OHC
mean	1	3.8	5.3	9.3	5.2	0.111	0.087	46.6	52
sem		0.2	0.5	0.2	0.1	0.006	0.008	1.1	2
n		10	4	11	19	10	4	10	10
mean	2	3.7	4.8	9.5	5.7	0.114	0.096	56.4	57
sem		0.1	0.2	0.2	0.1	0.004	0.003	0.6	1
n		10	10	6	10	10	10	10	10
mean	4	3.6	4.1	9.4	6.3	0.117	0.113	59	70.6
sem		0.2	0.2	0.2	0.1	0.006	0.004	0.8	2
n		10	10	17	13	10	10	10	10
mean	15	3.3		9.2		0.127		66.6
sem		0.1		0.1		0.005		0.9
n		6		8		6		10

## Sheet: Raw data - h
h (µm)
OHC				IHC
1kHz	2kHz	4kHz		1kHz	2kHz	4kHz	15kHz
4	4	2.8		2.8	3.1	3.1	3
5	4.2	3.7		3.3	3.2	3.2	3.1
6	4.4	3.9		3.3	3.3	3.4	3.3
6	4.5	4		3.4	3.4	3.5	3.5
	4.7	4.1		3.4	3.6	3.5	3.6
	4.8	4.3		3.7	3.8	3.5	3.6
	5.1	4.3		4.1	3.8	3.6
	5.2	4.3		4.2	3.9	3.6
	5.2	4.5		4.2	4.1	3.8
	5.4	4.7		5.2	4.3	5.1

## Sheet: Raw data - W
W (µm)
OHC				IHC
1kHz	2kHz	4kHz		1kHz	2kHz	4kHz	15kHz
5.7	5.2	6.2		9.8	9.3	7.6	9.9
4.9	5.5	6.5		9.7	9.3	9.2	8.8
6	5.7	6.5		9.3	10.3	8.5	9.3
6	5.6	5.9		8.5	9.4	10.2	9.3
4.7	6	6.8		9.5	9.3	8.5	9
5	5.7	6.2		9.8	9.6	9.1	9.3
5.4	6	6.4		10.2		9.9	8.7
5.2	5.7	6.5		9.5		10.1	9
5.7	5.9	6.4		8		8.9
4.9	5.7	6.7		9.3		9.4
4.9		5.9		8.8		10.7
4.6		6.4				8.7
4.9		5.9				9.7
5.5						9.3
4.2						10.5
3.9						10.9
5.9						9.2
5.4
6.2

## Sheet: Raw data - Nsp
NSP
OHC				IHC
1kHz	2kHz	4kHz		1kHz	2kHz	4kHz	15kHz
45	52	62		41	54	55	62
47	54	65		42	54	56	64
52	55	66		44	55	57	65
63	55	68		45	56	58	65
44	56	69		46	56	59	66
52	56	71		48	56	59	67
51	58	74		49	57	60	67
59	60	76		49	58	61	69
58	62	77		50	59	62	70
49	65	78		52	59	63	71
