# Supplementary material for: Stiffness and tension gradients of the hair cell’s tip-link complex in the mammalian cochlea
Source: eLife. 2019 Apr 1;8:e43473. doi: 10.7554/eLife.43473 (PMC6464607; doi:10.7554/eLife.43473)
Supplement: Figure 3—source data 5. [file elife-43473-fig3-data5.xlsx]

## Sheet: Summary data
	CF (kHz)	IMAX (nA)		NTL
		IHC	OHC	IHC	OHC
mean	1	1.31	0.6	37	45
sem		0.09	0.03	2	8
n		10	10	10	10
mean	2	1.57	0.86	44	59
sem		0.1	0.04	3	3
n		10	10	10	10
mean	4	1.16	1.15	33	65
sem		0.09	0.06	2	3
n		10	10	10	10
mean	15	1.5		42
sem		0.16		5
n		10		10

## Sheet: Raw data - transduction current
IMAX (nA)
OHC				IHC
1kHz	2kHz	4kHz		1kHz	2kHz	4kHz	15kHz
0.35	0.65	0.8		0.95	1.15	0.75	0.95
0.35	0.7	1		1	1.25	0.85	1.05
0.35	0.75	1.05		1	1.4	1.05	1.2
0.45	0.8	1.1		1.15	1.4	1.05	1.3
0.5	0.8	1.1		1.4	1.5	1.15	1.5
0.55	0.9	1.15		1.4	1.55	1.15	1.5
0.65	0.95	1.15		1.4	1.6	1.25	1.5
0.68	1	1.3		1.45	1.8	1.3	1.55
0.75	1	1.35		1.55	1.8	1.35	1.65
1.4	1.05	1.45		1.75	2.2	1.7	2.8

## Sheet: Raw data - tip-link number
NTL
OHC				IHC
1kHz	2kHz	4kHz		1kHz	2kHz	4kHz	15kHz
26	44	46		27	32	21	27
26	48	57		28	35	24	30
26	51	60		28	40	30	34
34	55	64		32	40	30	37
38	55	65		40	42	32	42
41	61	65		40	44	32	42
49	65	65		40	45	35	42
51	68	74		41	51	37	44
57	68	77		44	51	38	47
106	72	83		49	62	48	79
