# Supplementary material for: Stiffness and tension gradients of the hair cell’s tip-link complex in the mammalian cochlea
Source: eLife. 2019 Apr 1;8:e43473. doi: 10.7554/eLife.43473 (PMC6464607; doi:10.7554/eLife.43473)
Supplement: Figure 5—source data 2. [file elife-43473-fig5-data2.xlsx]

## Sheet: Figure 5A - Summary data
	CF (kHz)	DXR (nm)
		IHC	OHC
mean	1	16	9
sem		2	3
n		13	13
mean	2	24	22
sem		4	4
n		12	12
mean	4	20	45
sem		5	10
n		11	12
mean	15	23
sem		5
n		10

## Sheet: Figure 5A - Raw data
DXR (nm)
OHC				IHC
1kHz	2kHz	4kHz		1kHz	2kHz	4kHz	15kHz
0	3.6	8		6	4	0	3
0.8	7	19		6	12	5	7
1	11	19.3		7	13	8	13
1.5	15	24		9	19	12	15
2	17	27		12	20	12	20
2	21	36		13	20	15	21
3	22	42		14	21	20	27
8	23	48		17.2	23	22	33
10	23.1	49		20	32	37	45
13	27	61		25.3	38	40	47
15	44	69		25.3	42	47
15.1	48	134		28	45
43				31
