# Supplementary material for: Stiffness and tension gradients of the hair cell’s tip-link complex in the mammalian cochlea
Source: eLife. 2019 Apr 1;8:e43473. doi: 10.7554/eLife.43473 (PMC6464607; doi:10.7554/eLife.43473)
Supplement: Figure 6—source data 1. — The table lists p-values resulting, respectively, from a one-way ANOVA to assay statistical significance of the measured mean-value variation of a given variable between different cochlear locations for inner (IHC) and outer (OHC) hair cells, from two-tailed unpaired Student's t-tests with Welch’s correction to compare mean values of the variable between two groups of a given hair-cell type (IHC or OHC) with different characteristic frequencies (CF) or between the two cell types (OHC/IHC) when they are associated to the same characteristic frequency. The last entry provides the p-value to assay the statistical significance between the slopes of a weighted linear regression of the relation between the variable and the characteristic frequency of the hair cell. A bold font was used to help find statistically significant differences. The variables in the table correspond to the negative hair-bundle movement ΔXCa, the corresponding increase in hair-bundle tension ΔT, and the maximal tension tmax in a single gating spring evoked by EDTA iontophoresis just before tip-link disruption. [file elife-43473-fig6-data1.docx]

|  | **ANOVA** | | **IHC** | | | | | |
| --- | --- | --- | --- | --- | --- | --- | --- | --- |
|  | IHC | OHC | 1-2 kHz | 1-4 kHz | 1-15 kHz | 2-4kHz | 2-15 kHz | 4-15 kHz |
|  | *p* =  1.9×10-1 | *p* =  4.6×10-1 | *p* =  6.8×10-1 | *p* =  9.5×10-2 | *p* =  4.1×10-1 | ****p* =**  **2.2×10-2** | *p* =  2.3×10-1 | *p* =  6.0×10-1 |
|  | ******p* =**  **6.5×10-6** | *****p* =**  **5.1×10-3** | *p* =  6.4×10-1 | ******p* =**  **6.3×10-4** | *****p* =**  **5.9×10-3** | ******p* =**  **2.8×10-4** | *****p* =**  **4.2×10-3** | *p* =  4.0×10-1 |
|  | ******p* =**  **3.1×10-6** | ******p* =**  **7.2×10-4** | *p* =  5.8×10-1 | *****p* = 1.4×10-3** | *****p* =**  **1.8×10-3** | ******p* =**  **5.1×10-4** | ******p* =**  **7.7×10-4** | *p* =  1 |
|  | **OHC** | | | **OHC/IHC** | | | Gradient OHC *vs.*  gradient IHC | |
|  | 1-2 kHz | 1-4 kHz | 2-4 kHz | 1 kHz | 2 kHz | 4 kHz |
|  | *p* =  4.3×10-1 | *p* =  2.7×10-1 | *p* =  5.9×10-1 | *p* =  3.5×10-1 | *p* =  8.2×10-1 | *p* =  4.6×10-1 | *p* =  7.1×10-2 | |
|  | ****p* =**  **4.9×10-2** | ****p* =**  **1.0×10-2** | *p* =  5.8×10-2 | *p* =  8.8×10-1 | *****p* =**  **5.5×10-3** | *p* =  2.7×10-1 | ****p* =  1.7×10-2** | |
|  | *p* =  1.3×10-1 | *****p* =**  **3.9×10-3** | ****p* =**  **2.8×10-2** | *p* =  8.4×10-1 | ****p* =  4.9×10-2** | *p* =  4.9×10-1 | ****p* =  2.2×10-2** | |

**Figure 6‒source data 1: Statistical significance.**

The table lists p-values resulting, respectively, from a one-way ANOVA to assay statistical significance of the measured mean-value variation of a given variable between different cochlear locations for inner (IHC) and outer (OHC) hair cells, from two-tailed unpaired Student's *t*-tests with Welch’s correction to compare mean values of the variable between two groups of a given hair-cell type (IHC or OHC) with different characteristic frequencies (CF) or between the two cell types (OHC/IHC) when they are associated to the same characteristic frequency. The last entry provides the p-value to assay the statistical significance between the slopes of a weighted linear regression of the relation between the variable and the characteristic frequency of the hair cell. A bold font was used to help find statistically significant differences. The variables in the table correspond to the negative hair-bundle movement , the corresponding increase in hair-bundle tension , and the maximal tension in a single gating spring evoked by EDTA iontophoresis just before tip-link disruption.
