# Supplementary material for: Stiffness and tension gradients of the hair cell’s tip-link complex in the mammalian cochlea
Source: eLife. 2019 Apr 1;8:e43473. doi: 10.7554/eLife.43473 (PMC6464607; doi:10.7554/eLife.43473)
Supplement: Figure 6—source data 2. [file elife-43473-fig6-data2.xlsx]

## Sheet: Figure 6A - Summary data
	CF (kHz)	DXCa (nm)
		IHC	OHC
mean	1	-25	-19
sem		4	5
n		13	12
mean	2	-23	-24
sem		3	3
n		12	12
mean	4	-35	-28
sem		4	6
n		11	12
mean	15	-31
sem		6
n		10

## Sheet: Figure 6A - Raw data
DXCa (nm)
OHC				IHC
1kHz	2kHz	4kHz		1kHz	2kHz	4kHz	15kHz
-3.4	-9	-3		-5.9	-9	-12	-11
-4.8	-11	-9		-11	-10	-20	-14
-5	-14	-12.3		-12	-14	-20	-14
-7	-16.2	-15		-15	-18	-28	-20
-9	-18	-19		-17	-20	-29	-22
-9.5	-21	-21		-18	-23	-30	-26
-15	-23	-23		-22	-26	-33	-32
-24	-23.3	-24		-24	-27	-35	-41
-25	-27	-31		-33.1	-30	-43	-61
-25	-33	-39		-35	-32	-46	-66
-39	-44	-69		-36	-32	-62
-65	-49	-71		-40.7	-38
				-53
